# Supplementary material for: A novel FGFR1-binding peptide exhibits anti-tumor effect on lung cancer by inhibiting proliferation and angiogenesis
Source: PubMed Central journal article supplement — Int J Biol Sci. 2018 Jul 27;14(10):1389–98. doi: 10.7150/ijbs.24739 (PMC6097486; doi:10.7150/ijbs.24739), 2018-07-27
Supplement: ijbsv14p1389s1.pdf [file ijbsv14p1389s1.pdf]

## Additional file

**Additional file 1: Table S1.** Properties of peptides displayed by positive phages.

**Additional file 2: Table S2.** Binding affinity of peptide R1-P2 to human FGFR1 protein.

**Additional file 3: Figure S1. Expression of blood vessels marker of tumor sections. (A)**

Expression of CD31 in tumor sections were detected by immunofluorescence staining (red arrows represents blood vessels). **(B)** Expression of SM22 in tumor sections were detected by immunofluorescence staining (red arrows represents blood vessels). Bar = 100  $\mu\text{m}$ , the error bars indicate the  $\pm$  SD from three separate experiments, \*\* $P < 0.01$ , \*\*\* $P < 0.001$ , versus blank.

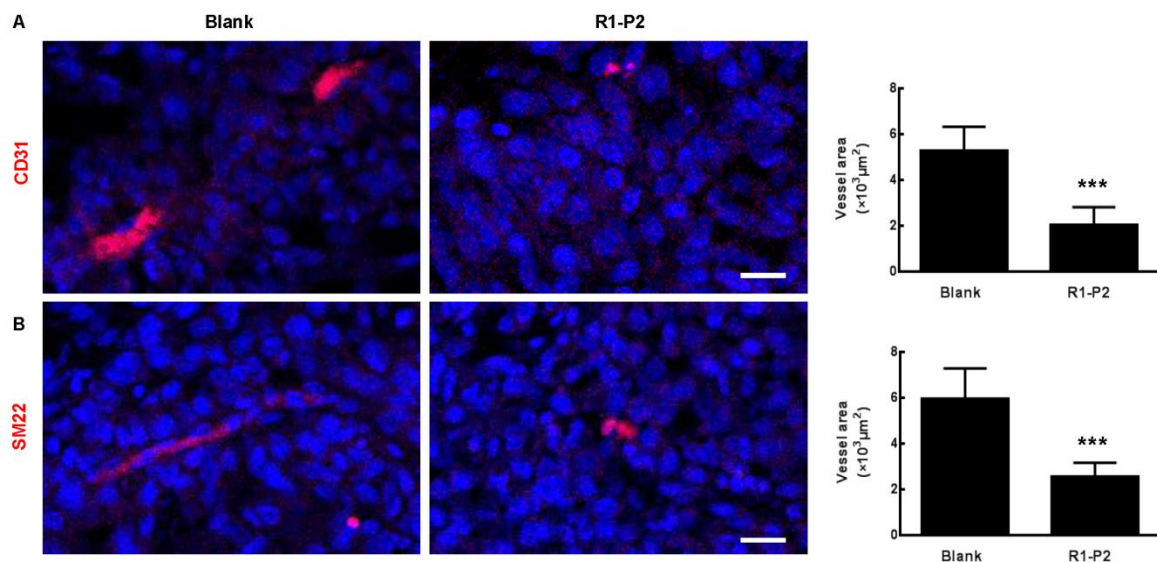

Supplemental Figure S1

**Supplementary Table 1.** Properties of peptides displayed by positive phages

| Heptapeptide | Clones | Sequence    | Molecular weight | Theoretical pI <sup>a</sup> | GRAVY <sup>b</sup> |
|--------------|--------|-------------|------------------|-----------------------------|--------------------|
| R1-P2        | 8      | FHDAWPNLKSS | 1388.50          | 6.74                        | -0.883             |

<sup>a</sup> pI, Isoelectric Point.

<sup>b</sup> GRAVY, Grand Average of Hydropathicity.

**Table S2.** Binding affinity of peptide R1-P2 to human FGFR1 protein

| Ligand | Analyte | K <sub>a</sub> (1/Ms) | K <sub>d</sub> (1/s) | KD(M)                  |
|--------|---------|-----------------------|----------------------|------------------------|
| R1-P2  | FGFR1   | $3.611 \times 10^4$   | 0.005555             | $1.538 \times 10^{-7}$ |
